# Supplementary material for: Photomotion of Hydrogels with Covalently Attached Azo Dye Moieties—Thermoresponsive and Non-Thermoresponsive Gels
Source: Gels. 2022 Aug 28;8(9):541. doi: 10.3390/gels8090541 (PMC9498539; doi:10.3390/gels8090541)
Supplement: Supplementary file 1 [file gels-08-00541-s001.zip]

Archive with 4 entries (4 files):
- MovieS1_PNR_aqueous.mp4
- MovieS2_P22C_aqueous.mp4
- MovieS3_P22C_Isopropanol.mp4
- Photomotion of Hydrogels with Azobenzene Moieties ESI Gels rev1.pdf
